# Supplementary material for: Enhancing COVID-19 Forecasts Through Multivariate Deep Learning Models
Source: Research Square preprint supplement (doi:10.21203/rs.3.rs-5400759/v1), 2024-11-28
Supplement: Supplementary file 1 [file dfa87042ca691d78f46ed1bd.docx]

**Supplementary Material**

Supplementary Figure 1 Mean RMSE over five periods in JPN for eight different models. The blue triangle indicates the minimum mean RMSE, achieved with the CNN-LSTM model using data from 20 countries.


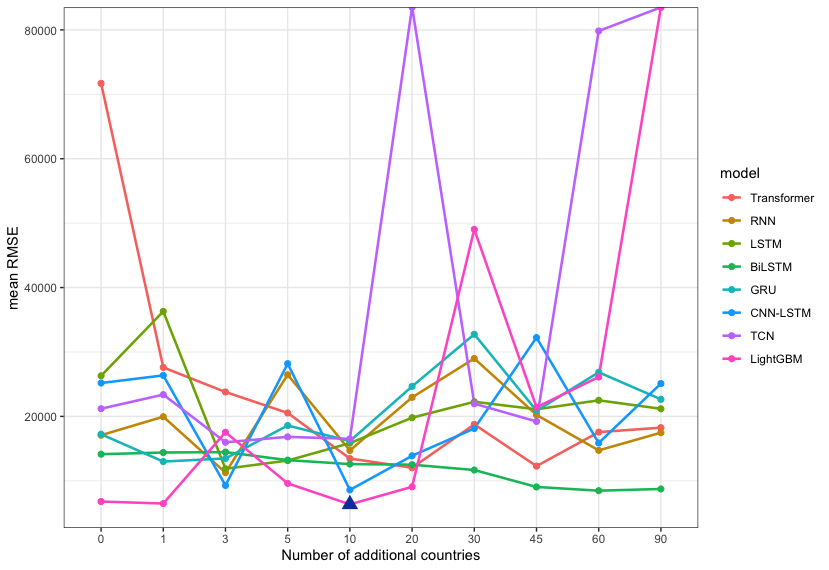


Supplementary Figure 2 Mean RMSE over five periods in RUS for eight different models. The blue triangle indicates the minimum mean RMSE, achieved with the lightgbm model using data from 10 countries.


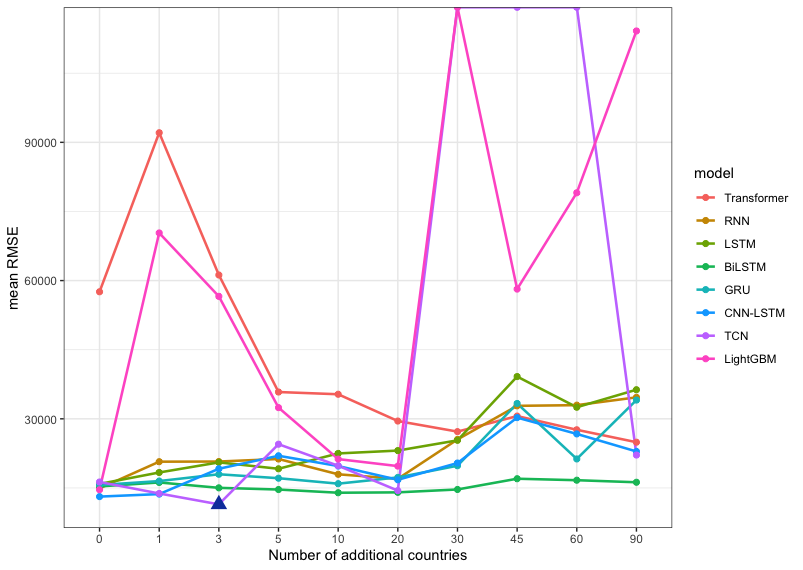


Supplementary Figure 3 Mean RMSE over five periods in ITA for eight different models. The blue triangle indicates the minimum mean RMSE, achieved with the TCN model using data from 3 countries.


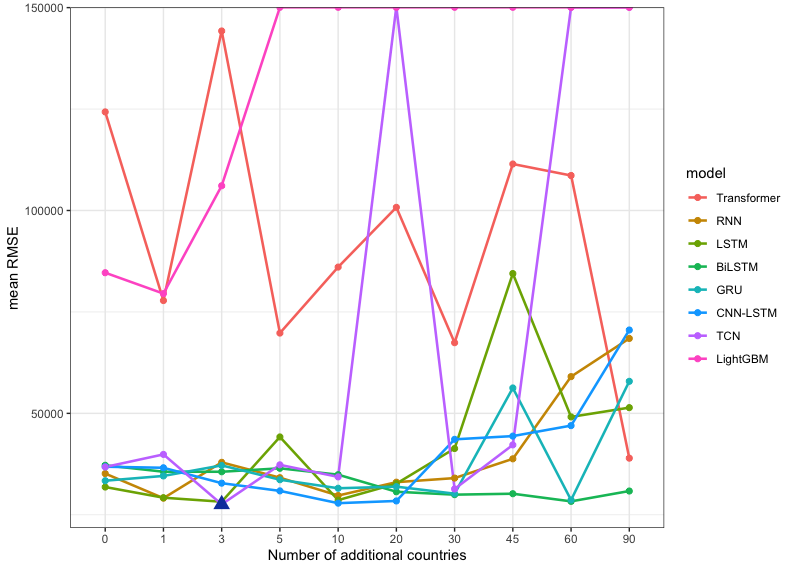


Supplementary Figure 4 Mean RMSE over five periods in USA for eight different models. The blue triangle indicates the minimum mean RMSE, achieved with the TCN model using data from 3 countries.

Supplementary Table Hyperparameter tuning ranges for the transformer encoder with fully connected layer

| **Encoder Layers** | **Attention Heads** | **Embedding Dimension** | **Feedforward Dimension** | **Dropout**  **Rate** | **Learning Rate** | **Batch**  **Size** |
| --- | --- | --- | --- | --- | --- | --- |
| [2, 3,4, 5, 6] | [4, 8, 12] | [32, 64, 128] | [128, 256, 512] | [0.1, 0.2, 0.3, 0.4, 0.5] | [0.0001~0.001] | [4, 8, 16, 32, 64] |

**Supplementary Table 2. Hyperparameter Ranges for RNNs, LSTMs, BiLSTM, and GRU**

| **hidden layers** | **hidden units per layer** | **dropout rate** | **Learning Rate** | **Batch Size** |
| --- | --- | --- | --- | --- |
| [1, 2, 4, 8] | [4, 8, 16, 32, 64, 128, 256] | [0.1, 0.2, 0.3, 0.4, 0.5] | [0.0001~0.001] | [4, 8, 16, 32] |

**Supplementary Table 3: Hyperparameter Ranges for CNN-LSTM**

| **CNN layers** | **filters per CNN layer** | **kernel size** | **LSTM layers** | **Hidden units per LSTM layer** | **dropout rate** | **Learning Rate** | **Batch Size** |
| --- | --- | --- | --- | --- | --- | --- | --- |
| [1, 2, 4, 8] | [8, 16, 32, 64] | [2, 3, 4, 5] | [1, 2, 4, 8] | [4, 8, 16, 32, 64, 128, 256] | [0.1, 0.2, 0.3, 0.4, 0.5] | [0.0001~0.001] | [4, 8, 16, 32] |

**Supplementary Table 4: Hyperparameter Ranges for TCN**

| **Residual Blocks** | **Filters per Block** | **Kernel Size** | **Dropout**  **Rate** | **Learning**  **Rate** | **Batch**  **Size** |
| --- | --- | --- | --- | --- | --- |
| [2, 3, 4] | [25, 50, 100] | [2, 3, 4, 5] | [0.1, 0.2, 0.3, 0.4, 0.5] | [0.0001~, 0.01] | [4, 8, 16, 32] |

**Supplementary Table 5: Hyperparameter Ranges for lightGBM**

| **num_leaves** | **min_child_samples** | **num_iterations** | **max_depth** | **learning_rate** | **colsample_bytree** | **reg_alpha** | **reg_lambda** | **min_split_gain** |
| --- | --- | --- | --- | --- | --- | --- | --- | --- |
| [4,8,16,32,64] | [2,4,8] | [2000] | [5,7,8,16] | [0.01] | [0.7,0.8,0.9] | [0,0.1,0.3] | [0,0.1,0.3], | [0.001] |

Supplementary Table 6: The five most informative countries for each target country based on DTW distance

| **Rank** | **Korea** | **Japan** | **Russia** | **Italy** | **USA** |
| --- | --- | --- | --- | --- | --- |
| 1 | China | Italy | India | Austria | France |
| 2 | Austria | Korea | Vietnam | Brazil | Italy |
| 3 | India | Turkey | China | France | Deutschland |
| 4 | Brazil | Deutschland | Turkey | Deutschland | Brazil |
| 5 | Russia | Austria | Austria | Korea | India |
| 6 | Deutschland | France | Korea | China | Japan |
| 7 | Vietnam | Brazil | Portugal | India | Austria |
| 8 | Italy | Mexico | Netherlands | Japan | Korea |
| 9 | France | India | India | Russia | UK |
| 10 | Japan | China | Italy | Portugal | China |
